# Supplementary material for: 6Li210B4O7 NPs-loaded plastic scintillators for fast/thermal neutron and gamma ray detection
Source: Royal Society of Chemistry journal article supplement (doi:10.1039/c9qm00222g), 2019-01-01
Supplement: c9qm00222g1.pdf [file c9qm00222g1.pdf]

**ESI: Sized-controlled synthesis of  ${}^6\text{Li}_2{}^{10}\text{B}_4\text{O}_7$  NPs for fast/thermal neutrons and gamma rays detection in plastic scintillation**

Camille Frangville<sup>a</sup>, Amélie Grabowski<sup>a</sup>, Jonathan Dumazert<sup>a</sup>, Eva Montbarbon<sup>a</sup>, Clément Lynde<sup>a</sup>, Romain Coulon<sup>a</sup>, Amélie Venerosy<sup>b</sup>, Guillaume H. V. Bertrand<sup>a</sup>, Matthieu Hamel<sup>a,\*</sup>

Matthieu.hamel@cea.fr

CEA, LIST, *Laboratoire Capteurs et Architectures Electroniques*

CEA Saclay

91191 Gif-sur-Yvette. FRANCE

**Li<sub>2</sub>B<sub>4</sub>O<sub>7</sub>/PVP<sub>40k</sub> hybrid aggregate drying methods prior curing**

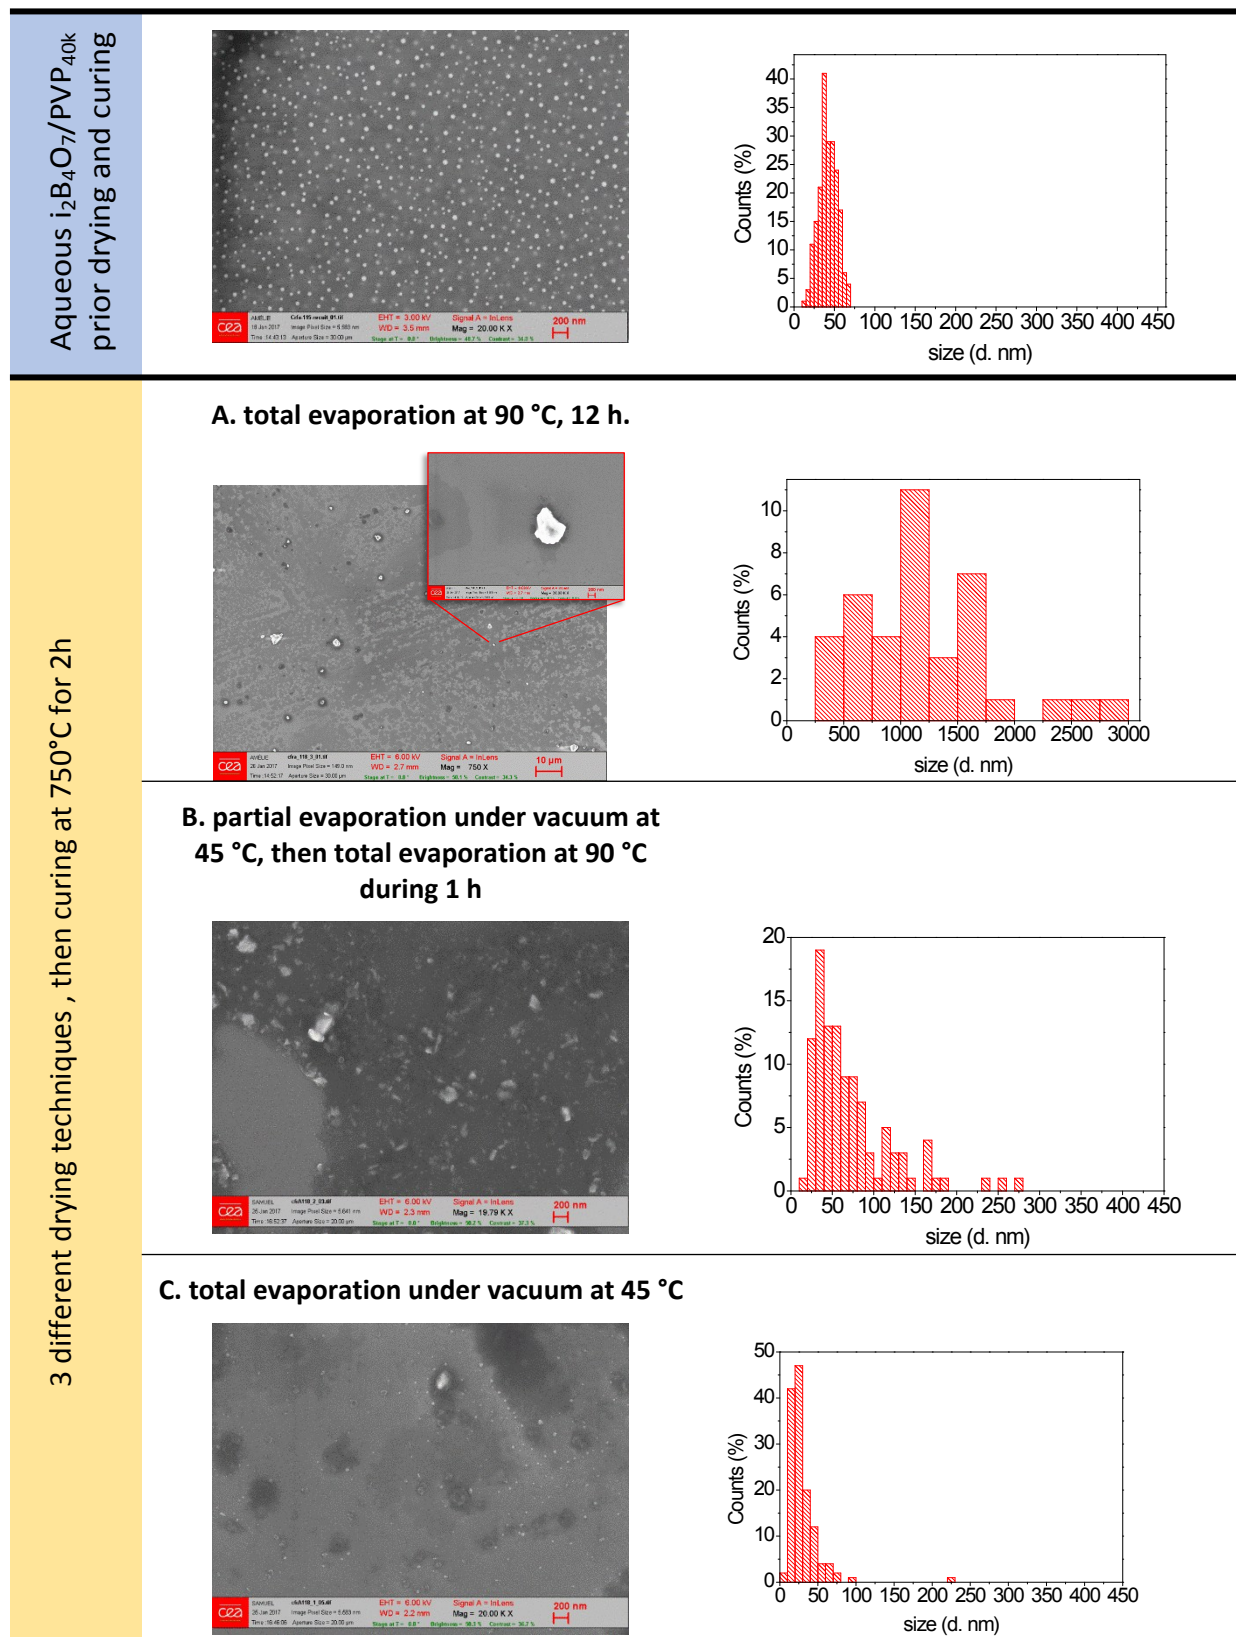

# Enriched ${}^6\text{Li}_2{}^{10}\text{B}_4\text{O}_7$ NPs

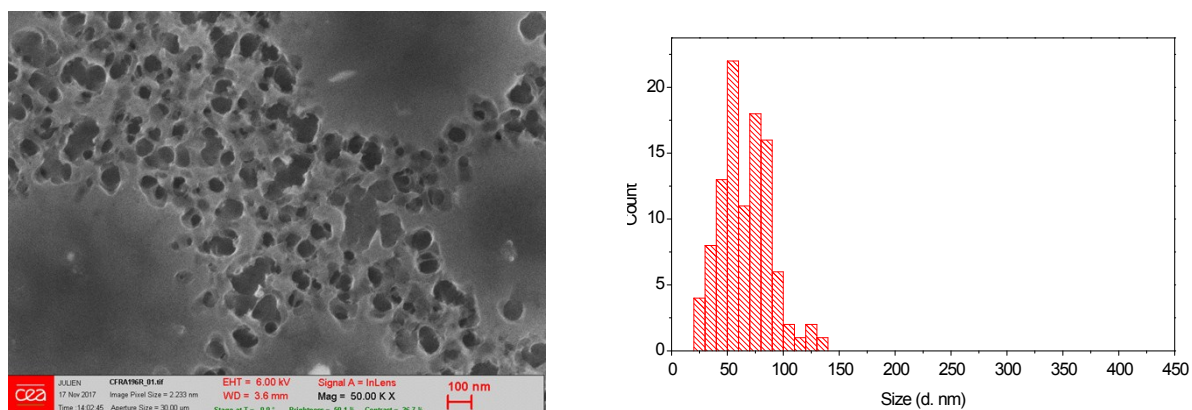

Figure SI-2.  ${}^6\text{Li}_2{}^{10}\text{B}_4\text{O}_7$  NPs; left. SEM images, right. corresponding NPs size distribution.

## ${}^6\text{Li}_2{}^{10}\text{B}_4\text{O}_7$ NPs loaded plastic scintillator

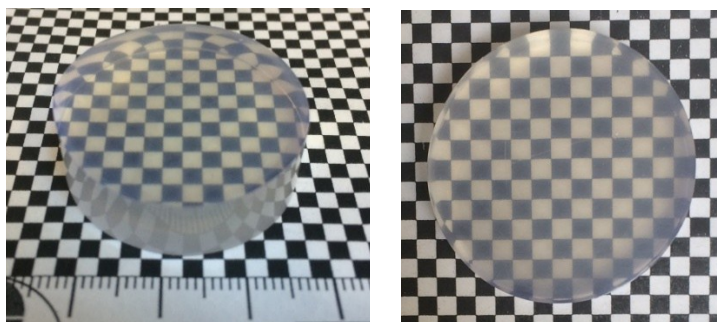

Figure SI-3. Pictures of a 0.3wt%  ${}^6\text{Li}_2{}^{10}\text{B}_4\text{O}_7$  NPs loaded PS; diam. 32mm; height 11mm

Table SI-1. Characteristics of the lithium tetraborate-loaded plastic scintillator used in this study.

|                                                         |                           |
|---------------------------------------------------------|---------------------------|
| Diameter (mm)                                           | 31.8                      |
| Thickness (mm)                                          | 10.6                      |
| Weight (g)                                              | 9.1746                    |
| Density ( $\text{g}\cdot\text{cm}^{-3}$ )               | 1.09                      |
| Shore-D hardness                                        | 85                        |
| ${}^6\text{Lithium}$ content (wt%)                      | 0.0082                    |
| ${}^{10}\text{Boron}$ content (wt%)                     | 0.0256                    |
| $\lambda_{em}^{max}$ (nm)                               | 424                       |
| Transmission at 424 nm (%)                              | 17                        |
| Decay time (ns; $\lambda_{ex} = 274$ nm)                | 2.17 (86.1) + 9.02 (13.9) |
| Decay time (ns; $\lambda_{ex} = 368$ nm)                | 1.80                      |
| Scintillation yield ( $\text{ph}\cdot\text{MeV}^{-1}$ ) | 3750                      |

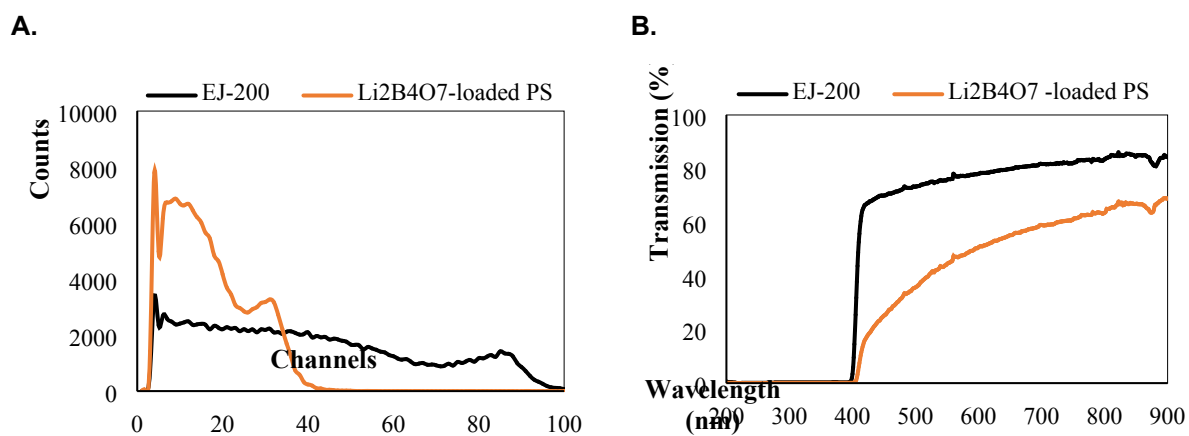

Figure SI-4. A. Pulse height spectra and B. Transmission spectrum of  ${}^6\text{Li}_2{}^{10}\text{B}_4\text{O}_7$ -loaded PS and EJ200 (corresponding sizes)

**n<sub>thermal</sub>, n<sub>fast</sub> and gamma detection**

Table SI-2. <sup>6</sup>Li and <sup>10</sup>B thermal neutron captures.

| Isotope         | Thermal neutron capture reaction                                                                     | 25 meV cross section (Barns) | Natural isotopic abundance (%) |
|-----------------|------------------------------------------------------------------------------------------------------|------------------------------|--------------------------------|
| <sup>6</sup> Li | <sup>6</sup> Li + n → <sup>3</sup> H (2.73 MeV) + α (2.05 MeV)                                       | 940                          | 7.5                            |
| <sup>10</sup> B | <sup>10</sup> B + n → <sup>7</sup> Li* + α (1.47 MeV) → <sup>7</sup> Li + α (1.8 MeV) + γ (0.48 MeV) | 3840                         | 19.9                           |

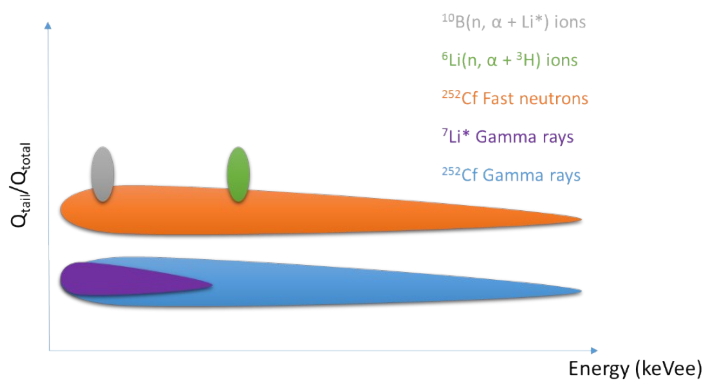

Figure SI-6. Ideal response of the NPs-loaded plastic scintillator towards a thermalized neutron source.

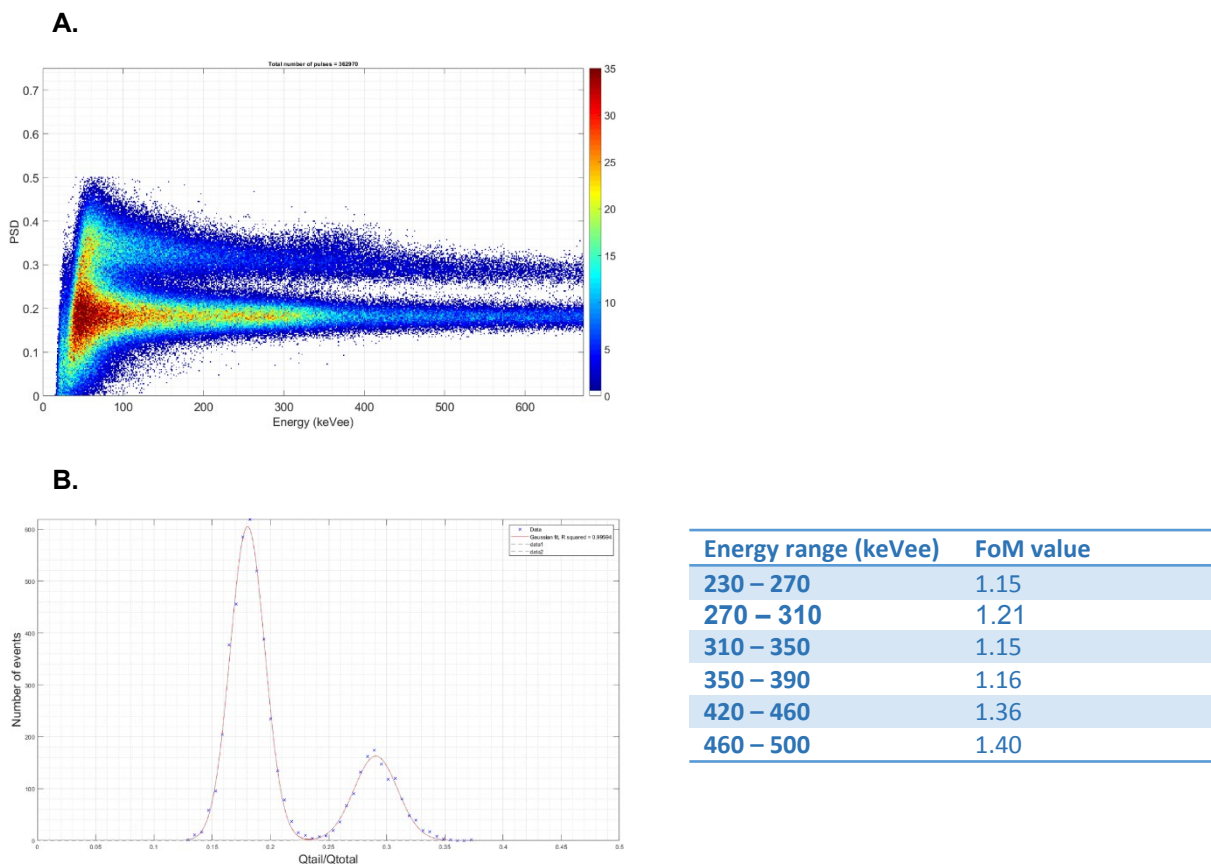

Figure SI-7. A. Neutron/gamma pulse shape discrimination pattern of the <sup>6</sup>Li<sub>2</sub><sup>10</sup>B<sub>4</sub>O<sub>7</sub> nanoparticles-loaded plastic scintillator. Partially thermalized and shielded <sup>252</sup>Cf source. B. Example of PSD cut [460;500 keVee] with the gamma (left) and the neutron (right) responses with corresponding FoM.

The quality of the PSD is quantitatively estimated from the calculation of the Figure of Merit (FoM), which has the following formula:

$$FoM = \frac{|\mu_n - \mu_\gamma|}{2.35(\sigma_n^2 + \sigma_\gamma^2)}$$

Where  $\mu_n$  and  $\mu_\gamma$  are the mean values of the neutron and the gamma ray contributions, and  $\sigma_n$  and  $\sigma_\gamma$  are the standard deviations of neutron and gamma distributions fit with Gaussian functions  $N(\mu_n, \sigma_n)$  and  $N(\mu_\gamma, \sigma_\gamma)$ .
